# Supplementary material for: Influence of Prolonged Visual Display Terminal Use on Physical and Mental Conditions among Health Care Workers at Tertiary Hospitals, Taiwan
Source: MDPI journal article supplement (doi:10.3390/ijerph19073770), 2022-03-22
Supplement: s1 [file s1]

**Supplement Table S1** Demography and characteristics of personal habits and working characters among hospital employees

| <b>Variables</b>                    | <b>Non-<br/>doctor/nurse<br/>(n = 945)</b> |        | <b>Doctor/nurse<br/>(n = 1868)</b> |        | <b>p value</b> |
|-------------------------------------|--------------------------------------------|--------|------------------------------------|--------|----------------|
| Age, years                          | 44.68 ± 11.20                              |        | 35.29 ± 10.96                      |        | <0.001         |
| Age (n, %)                          |                                            |        |                                    |        | <0.001         |
| <30                                 | 128                                        | 13.54% | 801                                | 42.88% |                |
| ≥30                                 | 817                                        | 86.46% | 1067                               | 57.12% |                |
| Women, n (%)                        | 771                                        | 81.59% | 1745                               | 93.40% | <0.001         |
| Education level, n (%)              |                                            |        |                                    |        | <0.001         |
| ≤Senior high school                 | 326                                        | 34.50% | 45                                 | 2.41%  |                |
| College                             | 499                                        | 52.80% | 1698                               | 90.90% |                |
| ≥Graduate School                    | 120                                        | 12.70% | 125                                | 6.69%  |                |
| Seniority, n (%)                    |                                            |        |                                    |        | 0.001          |
| < 2 years                           | 159                                        | 16.84% | 370                                | 19.81% |                |
| 2-4 years                           | 164                                        | 17.37% | 307                                | 16.43% |                |
| 4-10 years                          | 243                                        | 25.74% | 566                                | 30.30% |                |
| > 10 years                          | 378                                        | 40.04% | 625                                | 33.46% |                |
| Working hours/week, n (%)           |                                            |        |                                    |        | <0.001         |
| ≤ 45 hrs                            | 740                                        | 78.39% | 1058                               | 56.64% |                |
| 46-50 hrs                           | 185                                        | 19.60% | 609                                | 32.60% |                |
| 51-59 hrs                           | 14                                         | 1.48%  | 115                                | 6.16%  |                |
| ≥60 hrs                             | 5                                          | 0.53%  | 86                                 | 4.60%  |                |
| Work style, n (%)                   |                                            |        |                                    |        | <0.001         |
| Regular class                       | 692                                        | 73.23% | 753                                | 40.31% |                |
| Night shift                         | 17                                         | 1.80%  | 116                                | 6.21%  |                |
| Three shifts                        | 236                                        | 24.97% | 999                                | 53.48% |                |
| Smoking, n (%)                      | 49                                         | 5.19%  | 54                                 | 2.89%  | 0.002          |
| Drink, n (%)                        | 64                                         | 6.77%  | 123                                | 6.58%  | 0.85           |
| Exercise frequency (hu/week), n (%) |                                            |        |                                    |        | <0.001         |
| never                               | 373                                        | 39.47% | 959                                | 51.34% |                |
| 1 time per week                     | 276                                        | 29.21% | 483                                | 25.86% |                |
| 2-4 times per week                  | 257                                        | 27.20% | 380                                | 20.34% |                |
| ≥5 times per week                   | 39                                         | 4.13%  | 46                                 | 2.46%  |                |

\* Smoking status (current or past/never), alcohol consumption (0-1 drinks per week/≥2 drinks per week), exercise (≥30 mins/time)

**Supplement Table S2** Prevalence of musculoskeletal and visual system among hospital employees

| <b>Variables</b>                       | <b>Non-<br/>doctor/nurse<br/>(<i>n</i> = 945)</b> |        | <b>Doctor/nurse<br/>(<i>n</i> = 1868)</b> |        | <b><i>p</i><br/>value</b> |
|----------------------------------------|---------------------------------------------------|--------|-------------------------------------------|--------|---------------------------|
| Musculoskeletal pain, <i>n</i> (%)     |                                                   |        |                                           |        |                           |
| Neck                                   | 514                                               | 54.39% | 1244                                      | 66.60% | <0.001                    |
| Shoulders                              | 629                                               | 66.56% | 1413                                      | 75.64% | <0.001                    |
| Back                                   | 383                                               | 40.53% | 784                                       | 41.97% | 0.46                      |
| Elbows                                 | 260                                               | 27.51% | 392                                       | 20.99% | <0.001                    |
| Lower back or waist                    | 511                                               | 54.07% | 1189                                      | 63.65% | <0.001                    |
| Wrists or hands                        | 391                                               | 41.38% | 702                                       | 37.58% | 0.05                      |
| Hips or legs                           | 210                                               | 22.22% | 492                                       | 26.34% | 0.02                      |
| Number of pain area                    | 2.90 ± 1.81                                       |        | 3.05 ± 2.06                               |        | 0.04                      |
| Eye discomfort, <i>n</i> (%)           |                                                   |        |                                           |        | 0.02                      |
| Nerve                                  | 375                                               | 39.68% | 641                                       | 34.31% |                           |
| Mild-moderate                          | 432                                               | 45.71% | 924                                       | 49.46% |                           |
| Severe                                 | 138                                               | 14.60% | 303                                       | 16.22% |                           |
| Headache, <i>n</i> (%)                 |                                                   |        |                                           |        | <0.001                    |
| Nerve                                  | 455                                               | 48.15% | 707                                       | 37.85% |                           |
| Mild-moderate                          | 450                                               | 47.62% | 968                                       | 51.82% |                           |
| Severe                                 | 40                                                | 4.23%  | 193                                       | 10.33% |                           |
| Computer vision syndrome, <i>n</i> (%) |                                                   |        |                                           |        | <0.001                    |
| Nerve                                  | 375                                               | 39.68% | 641                                       | 34.31% |                           |
| Mild-moderate                          | 187                                               | 19.79% | 325                                       | 17.40% |                           |
| Severe                                 | 383                                               | 40.53% | 902                                       | 48.29% |                           |

**Supplement Table S3** Prevalence of mental stress among hospital employees

| <b>Variables</b>                           | <b>Non-doctor/nurse<br/>(<i>n</i> = 945)</b> |         | <b>Doctor/nurse<br/>(<i>n</i> =1 868)</b> |         | <b><i>p</i> value</b> |
|--------------------------------------------|----------------------------------------------|---------|-------------------------------------------|---------|-----------------------|
| BSRS-5 score (mean ± SD)                   | 4.15 ± 3.33                                  |         | 5.62 ± 3.91                               |         | <0.001                |
| BSRS-5, <i>n</i> (%)                       |                                              |         |                                           |         | <0.001                |
| ≤5                                         | 706                                          | 74.71%  | 1099                                      | 58.83%  |                       |
| 6-9                                        | 162                                          | 17.14%  | 456                                       | 24.41%  |                       |
| 10-14                                      | 68                                           | 7.20%   | 252                                       | 13.49%  |                       |
| ≥15                                        | 9                                            | 0.95%   | 61                                        | 3.27%   |                       |
| Self-rated Health Status, <i>n</i> (%)     |                                              |         |                                           |         | <0.001                |
| Good                                       | 326                                          | 34.50%  | 501                                       | 26.82%  |                       |
| Moderate                                   | 560                                          | 59.26%  | 1160                                      | 62.10%  |                       |
| Poor                                       | 59                                           | 6.24%   | 207                                       | 11.08%  |                       |
| Sleep duration, hours (mean, SD)           | 6.55                                         | 0.99    | 6.59                                      | 1.09    | 0.31                  |
| Self-assessment of sleep time              |                                              |         |                                           |         | 0.001                 |
| Good                                       | 416                                          | 44.02%  | 701                                       | 37.57%  |                       |
| Poor                                       | 529                                          | 55.98%  | 1165                                      | 62.43%  |                       |
| Burnout, <i>n</i> (%)                      | 61                                           | 6.46%   | 122                                       | 6.53%   | 0.94                  |
| Maslach Burnout Inventory (MBI) (Mean, SD) |                                              |         |                                           |         |                       |
| Emotional exhaustion                       | 40.29                                        | ± 19.19 | 49.98                                     | ± 19.80 | <0.001                |
| Personal accomplishment                    | 52.14                                        | ± 11.05 | 57.42                                     | ± 11.08 | <0.001                |
| Depersonalization                          | 29.48                                        | ± 18.57 | 38.14                                     | ± 19.35 | <0.001                |
| Job stress                                 |                                              |         |                                           |         | <0.001                |
| Mild ( <i>n</i> = 1602)                    | 682                                          | 72.17%  | 920                                       | 49.25%  |                       |
| Moderate ( <i>n</i> = 485)                 | 140                                          | 14.81%  | 345                                       | 18.47%  |                       |
| Sever ( <i>n</i> = 726)                    | 123                                          | 13.02%  | 603                                       | 32.28%  |                       |

*n* = numbers, SD = Standard deviation, BSRS = Brief Symptom Rating Scale, MBI = Maslach Burnout Inventory.
